# Supplementary material for: Dietary intake of tocopherols and risk of incident disabling dementia
Source: PubMed Central journal article supplement (PMC8361201; doi:10.1038/s41598-021-95671-7), 2021-08-12
Supplement: 41598_2021_95671_MOESM1_ESM.pdf [file 41598_2021_95671_MOESM1_ESM.pdf]

**TITLE: Dietary intake of tocopherols and risk of incident disabling dementia**

Shoko Aoki<sup>1</sup>, Kazumasa Yamagishi, MD, PhD<sup>1,2,3</sup>, Koutatsu Maruyama, PhD<sup>4</sup>, Rie Kishida, PhD<sup>1</sup>, Ai Ikeda, PhD<sup>5</sup>, Mitsumasa Umesawa, MD, PhD<sup>1,6</sup>, Cui Renzhe, MD, PhD<sup>7</sup>, Yasuhiko Kubota, MD, MPH, PhD<sup>2</sup>, Mina Hayama-Terada, MD, PhD<sup>2,8</sup>, Yuji Shimizu, MD, PhD<sup>2</sup>, Isao Muraki, MD, PhD<sup>7</sup>, Hironori Imano, MD, PhD<sup>7</sup>, Tomoko Sankai, MD, PhD<sup>9</sup>, Takeo Okada, MD, PhD<sup>2</sup>, Akihiko Kitamura, MD, PhD<sup>2,10</sup>, Masahiko Kiyama, MD, PhD<sup>2</sup>, Hiroyasu Iso, MD, MPH, PhD<sup>1,7</sup>

Supplemental Table 1. Characteristics of participants aged 40–64 years, according to quartiles of  $\alpha$ -tocopherol intake at the time of the dietary surveys, CIRCS 1985–1999

|                                                   | $\alpha$ -tocopherol |      |       |           | P for trend |
|---------------------------------------------------|----------------------|------|-------|-----------|-------------|
|                                                   | Q1 (Low)             | Q2   | Q3    | Q4 (High) |             |
| Median $\alpha$ -tocopherol <sup>a</sup> , mg/day | 4.1                  | 6.1  | 7.8   | 10.8      |             |
| Age, y                                            | 51.3                 | 51.3 | 51.0  | 51.4      | 0.49        |
| Women, %                                          | 39.6                 | 51.3 | 63.0  | 69.5      | <.0001      |
| Body mass index, kg/m <sup>2</sup>                | 23.7                 | 23.8 | 23.7  | 23.9      | 0.68        |
| Current smoker, %                                 | 37.5                 | 28.5 | 23.6  | 19.8      | 0.37        |
| Current drinker, %                                | 48.1                 | 43.7 | 35.7  | 29.8      | 0.12        |
| Systolic blood pressure, mmHg                     | 133                  | 130  | 129   | 130       | 0.00        |
| Diastolic blood pressure, mmHg                    | 82.5                 | 81.3 | 80.7  | 80.6      | 0.21        |
| Antihypertensive medication, %                    | 14.2                 | 12.1 | 9.4   | 13.8      | 0.01        |
| Diabetes mellitus, %                              | 5.9                  | 4.9  | 3.8   | 4.5       | 0.75        |
| History of stroke, %                              | 1.1                  | 1.1  | 1.3   | 0.6       | 0.59        |
| Serum total cholesterol, mg/dL                    | 198                  | 200  | 201   | 201       | 1.00        |
| Cholesterol-lowering medication, %                | 1.7                  | 2.6  | 2.7   | 1.7       | 0.26        |
| Energy, kcal/day                                  | 1971                 | 2001 | 1967  | 1966      | <.0001      |
| Carbohydrate, g/day                               | 306                  | 291  | 281   | 271       | 0.01        |
| Total fat, g/day                                  | 36.7                 | 36.7 | 46.5  | 50.1      | <.0001      |
| Protein, g/day                                    | 63.8                 | 70.4 | 72.1  | 75.3      | <.0001      |
| Total fiber, g/day                                | 12.5                 | 14.0 | 15.7  | 17.3      | <.0001      |
| Vegetables, g/day                                 | 204                  | 248  | 294   | 358       | <.0001      |
| Fruit, g/day                                      | 110                  | 141  | 157   | 171       | <.0001      |
| Fish, g/day                                       | 75.4                 | 91.4 | 101.6 | 117.8     | <.0001      |
| Meats, g/day                                      | 47.0                 | 54.2 | 50.5  | 42.8      | 0.0003      |
| Sodium, mg/day                                    | 4297                 | 4568 | 4727  | 4746      | <.0001      |
| DHA+EPA, mg/day                                   | 642                  | 939  | 978   | 1183      | 0.0003      |
| $\alpha$ -linolenic acid, mg/day                  | 947                  | 1288 | 1549  | 1930      | <.0001      |
| Linoleic acid, mg/day                             | 6590                 | 8307 | 9551  | 11191     | <.0001      |

<sup>a</sup>Energy-adjusted values by nutrient residual model.

Supplemental Table 2. Characteristics of participants aged 40–64 years, according to quartiles of  $\beta$ -tocopherol intake at dietary surveys, CIRCS 1985–1999

|                                                  | $\beta$ -tocopherol |       |      |           | P for trend |
|--------------------------------------------------|---------------------|-------|------|-----------|-------------|
|                                                  | Q1 (Low)            | Q2    | Q3   | Q4 (High) |             |
| Median $\beta$ -tocopherol <sup>a</sup> , mg/day | 0.2                 | 0.3   | 0.4  | 0.6       |             |
| Age, y                                           | 52.4                | 51.2  | 50.9 | 50.5      | <.0001      |
| Women, %                                         | 43.9                | 54.0  | 59.7 | 65.9      | <.0001      |
| Body mass index, kg/m <sup>2</sup>               | 23.7                | 23.7  | 23.6 | 24.0      | 0.09        |
| Current smoker, %                                | 35.5                | 27.0  | 25.5 | 21.4      | 0.13        |
| Current drinker, %                               | 47.6                | 40.3  | 36.7 | 32.7      | 0.95        |
| Systolic blood pressure, mmHg                    | 132                 | 130   | 130  | 130       | 0.49        |
| Diastolic blood pressure, mmHg                   | 81.8                | 81.3  | 80.9 | 81.1      | 0.88        |
| Antihypertensive medication, %                   | 12.6                | 12.7  | 10.8 | 13.4      | 0.15        |
| Diabetes mellitus, %                             | 5.4                 | 5.2   | 4.7  | 3.8       | 0.89        |
| History of stroke, %                             | 1.0                 | 1.0   | 0.7  | 1.4       | 0.25        |
| Serum total cholesterol, mg/dL                   | 198                 | 201   | 201  | 200       | 0.27        |
| Cholesterol-lowering medication, %               | 2.0                 | 1.7   | 1.7  | 3.2       | 0.06        |
| Energy, kcal/day                                 | 1987                | 1962  | 1972 | 1983      | 0.0002      |
| Carbohydrate, g/day                              | 303                 | 288   | 281  | 278       | 0.01        |
| Total fat, g/day                                 | 36.9                | 36.9  | 45.0 | 50.6      | <.0001      |
| Protein, g/day                                   | 69.9                | 70.4  | 71.3 | 70.0      | 0.009       |
| Total fiber, g/day                               | 13.3                | 14.3  | 15.3 | 16.5      | <.0001      |
| Vegetables, g/day                                | 262                 | 277   | 285  | 280       | 0.03        |
| Fruit, g/day                                     | 147                 | 142   | 148  | 141       | 0.27        |
| Fish, g/day                                      | 116.1               | 102.4 | 90.4 | 77.5      | <.0001      |
| Meats, g/day                                     | 46.6                | 50.2  | 52.3 | 45.5      | <.0001      |
| Sodium, mg/day                                   | 4329                | 4412  | 4649 | 4949      | <.0001      |
| DHA+EPA, mg/day                                  | 1186                | 997   | 899  | 661       | <.0001      |
| $\alpha$ -linolenic acid, mg/day                 | 808                 | 1240  | 1566 | 2099      | <.0001      |
| Linoleic acid, mg/day                            | 5250                | 7824  | 9834 | 12,729    | <.0001      |

<sup>a</sup>Energy-adjusted values by nutrient residual model.

Supplemental Table 3. Characteristics of participants aged 40–64 years, according to quartiles of  $\gamma$ -tocopherol intake at dietary surveys, CIRCS 1985–1999

|                                                   | $\gamma$ -tocopherol |       |      |           | P for trend |
|---------------------------------------------------|----------------------|-------|------|-----------|-------------|
|                                                   | Q1 (Low)             | Q2    | Q3   | Q4 (High) |             |
| Median $\gamma$ -tocopherol <sup>a</sup> , mg/day | 4.7                  | 8.7   | 12.4 | 18.4      |             |
| Age, y                                            | 52.2                 | 51.1  | 51.3 | 50.4      | <.0001      |
| Women, %                                          | 41.5                 | 52.6  | 59.8 | 69.5      | <.0001      |
| Body mass index, kg/m <sup>2</sup>                | 23.7                 | 23.8  | 23.7 | 23.8      | 0.50        |
| Current smoker, %                                 | 35.3                 | 28.7  | 24.8 | 20.6      | 0.87        |
| Current drinker, %                                | 51.7                 | 39.4  | 35.8 | 30.4      | 0.01        |
| Systolic blood pressure, mmHg                     | 132                  | 130   | 131  | 129       | 0.03        |
| Diastolic blood pressure, mmHg                    | 82.6                 | 81.3  | 81.2 | 79.9      | 0.02        |
| Antihypertensive medication, %                    | 13.0                 | 12.7  | 11.3 | 12.5      | 0.47        |
| Diabetes mellitus, %                              | 5.4                  | 4.8   | 4.5  | 4.4       | 0.92        |
| History of stroke, %                              | 1.0                  | 1.2   | 0.7  | 1.2       | 0.40        |
| Serum total cholesterol, mg/dL                    | 199                  | 200   | 200  | 201       | 0.95        |
| Cholesterol-lowering medication, %                | 1.7                  | 2.1   | 2.1  | 2.7       | 0.44        |
| Energy, kcal/day                                  | 1992                 | 1993  | 1949 | 1971      | <.0001      |
| Carbohydrate, g/day                               | 307                  | 295   | 279  | 268       | <.0001      |
| Total fat, g/day                                  | 35.3                 | 35.3  | 43.8 | 49.6      | <.0001      |
| Protein, g/day                                    | 69.3                 | 72.1  | 70.0 | 70.1      | <.0001      |
| Total fiber, g/day                                | 13.2                 | 14.6  | 15.0 | 16.7      | <.0001      |
| Vegetables, g/day                                 | 245                  | 270   | 281  | 306       | <.0001      |
| Fruit, g/day                                      | 139                  | 144   | 147  | 148       | 0.98        |
| Fish, g/day                                       | 109.4                | 104.8 | 90.3 | 81.9      | <.0001      |
| Meats, g/day                                      | 44.7                 | 48.7  | 52.3 | 48.9      | 0.004       |
| Sodium, mg/day                                    | 4378                 | 4676  | 4570 | 4714      | <.0001      |
| DHA+EPA, mg/day                                   | 1126                 | 1024  | 889  | 705       | <.0001      |
| $\alpha$ -linolenic acid, mg/day                  | 666                  | 1129  | 1536 | 2382      | <.0001      |
| Linoleic acid, mg/day                             | 4674                 | 7367  | 9642 | 13,955    | <.0001      |

<sup>a</sup>Energy-adjusted values by nutrient residual model.

Supplemental Table 4. Characteristics of participants aged 40–64 years, according to quartiles of  $\delta$ -tocopherol intake at dietary surveys, CIRCS 1985–1999

|                                                   | $\delta$ -tocopherol |       |      |           | P for trend |
|---------------------------------------------------|----------------------|-------|------|-----------|-------------|
|                                                   | Q1 (Low)             | Q2    | Q3   | Q4 (High) |             |
| Median $\delta$ -tocopherol <sup>a</sup> , mg/day | 1.4                  | 2.6   | 3.6  | 5.3       |             |
| Age, y                                            | 51.3                 | 51.1  | 51.3 | 51.4      | 0.86        |
| Women, %                                          | 43.9                 | 53.4  | 59.3 | 67.0      | <.0001      |
| Body mass index, kg/m <sup>2</sup>                | 23.7                 | 23.7  | 23.7 | 24.0      | 0.20        |
| Current smoker, %                                 | 33.5                 | 28.7  | 26.2 | 20.9      | 0.89        |
| Current drinker, %                                | 49.7                 | 40.2  | 37.3 | 30.1      | 0.09        |
| Systolic blood pressure, mmHg                     | 131                  | 131   | 130  | 130       | 0.54        |
| Diastolic blood pressure, mmHg                    | 82.3                 | 81.3  | 80.5 | 81.0      | 0.12        |
| Antihypertensive medication, %                    | 11.6                 | 12.5  | 11.1 | 14.3      | 0.17        |
| Diabetes mellitus, %                              | 5.8                  | 3.6   | 5.3  | 4.4       | 0.18        |
| History of stroke, %                              | 1.0                  | 0.6   | 1.0  | 1.5       | 0.18        |
| Serum total cholesterol, mg/dL                    | 199                  | 201   | 200  | 201       | 0.70        |
| Cholesterol-lowering medication, %                | 0.9                  | 3.2   | 1.6  | 3.0       | 0.001       |
| Energy, kcal/day                                  | 1989                 | 1997  | 1970 | 1949      | 0.001       |
| Carbohydrate, g/day                               | 299                  | 293   | 285  | 273       | 0.04        |
| Total fat, g/day                                  | 39.0                 | 39.0  | 46.2 | 49.5      | <.0001      |
| Protein, g/day                                    | 68.7                 | 70.7  | 71.0 | 71.1      | <.0001      |
| Total fiber, g/day                                | 12.8                 | 14.3  | 15.3 | 17.1      | <.0001      |
| Vegetables, g/day                                 | 242                  | 276   | 290  | 296       | <.0001      |
| Fruit, g/day                                      | 145                  | 146   | 138  | 149       | 0.31        |
| Fish, g/day                                       | 107.9                | 102.7 | 93.2 | 82.5      | <.0001      |
| Meats, g/day                                      | 48.7                 | 51.9  | 50.7 | 43.2      | 0.02        |
| Sodium, mg/day                                    | 4226                 | 4519  | 4634 | 4958      | <.0001      |
| DHA+EPA, mg/day                                   | 1102                 | 1008  | 910  | 723       | <.0001      |
| $\alpha$ -linolenic acid, mg/day                  | 764                  | 1227  | 1571 | 2152      | <.0001      |
| Linoleic acid, mg/day                             | 5361                 | 7894  | 9639 | 12,744    | <.0001      |

<sup>a</sup>Energy-adjusted values by nutrient residual model.

Supplemental Table 5. Multivariable hazard ratios and 95% confidence intervals of disability dementia in follow-up of all participants from 2009 according to quartiles of total tocopherol,  $\alpha$ -,  $\beta$ -,  $\gamma$ - and  $\delta$ -tocopherol intakes

| Total tocopherol     |        |                      |  |                      |  |                      |  |  |         |
|----------------------|--------|----------------------|--|----------------------|--|----------------------|--|--|---------|
|                      | Q1     | Q2                   |  | Q3                   |  | Q4                   |  |  | Trend P |
| Person-years         | 13,873 | 14,458               |  | 14,571               |  | 15,016               |  |  |         |
| Number of cases      | 156    | 152                  |  | 140                  |  | 127                  |  |  |         |
| Model 1              | 1.00   | 0.97 ( 0.77 - 1.21 ) |  | 0.89 ( 0.71 - 1.12 ) |  | 0.79 ( 0.62 - 1.00 ) |  |  | 0.04    |
| Model 2              | 1.00   | 0.99 ( 0.79 - 1.23 ) |  | 0.91 ( 0.72 - 1.15 ) |  | 0.78 ( 0.61 - 1.00 ) |  |  | 0.04    |
| Model 3              | 1.00   | 0.83 ( 0.65 - 1.06 ) |  | 0.66 ( 0.49 - 0.89 ) |  | 0.43 ( 0.28 - 0.66 ) |  |  | <.0001  |
| Model 4              | 1.00   | 0.94 ( 0.74 - 1.20 ) |  | 0.83 ( 0.62 - 1.11 ) |  | 0.67 ( 0.44 - 1.01 ) |  |  | 0.05    |
| $\alpha$ -tocopherol |        |                      |  |                      |  |                      |  |  |         |
|                      | Q1     | Q2                   |  | Q3                   |  | Q4                   |  |  | Trend P |
| Person-years         | 13,966 | 14,562               |  | 14,675               |  | 14,714               |  |  |         |
| Number of cases      | 158    | 129                  |  | 146                  |  | 142                  |  |  |         |
| Model 1              | 1.00   | 0.72 ( 0.57 - 0.91 ) |  | 0.84 ( 0.67 - 1.06 ) |  | 0.75 ( 0.59 - 0.95 ) |  |  | 0.07    |
| Model 2              | 1.00   | 0.72 ( 0.57 - 0.91 ) |  | 0.86 ( 0.68 - 1.09 ) |  | 0.76 ( 0.59 - 0.97 ) |  |  | 0.10    |
| Model 3              | 1.00   | 0.70 ( 0.55 - 0.89 ) |  | 0.82 ( 0.64 - 1.05 ) |  | 0.70 ( 0.53 - 0.93 ) |  |  | 0.05    |
| Model 4              | 1.00   | 0.73 ( 0.57 - 0.92 ) |  | 0.88 ( 0.66 - 1.12 ) |  | 0.78 ( 0.59 - 1.02 ) |  |  | 0.20    |
| $\beta$ -tocopherol  |        |                      |  |                      |  |                      |  |  |         |
|                      | Q1     | Q2                   |  | Q3                   |  | Q4                   |  |  | Trend P |
| Person-years         | 14,277 | 14,610               |  | 14,460               |  | 14,570               |  |  |         |
| Number of cases      | 161    | 148                  |  | 133                  |  | 133                  |  |  |         |
| Model 1              | 1.00   | 1.02 ( 0.82 - 1.28 ) |  | 0.88 ( 0.69 - 1.11 ) |  | 0.96 ( 0.76 - 1.22 ) |  |  | 0.48    |
| Model 2              | 1.00   | 1.04 ( 0.83 - 1.30 ) |  | 0.90 ( 0.71 - 1.13 ) |  | 0.95 ( 0.75 - 1.21 ) |  |  | 0.45    |
| Model 3              | 1.00   | 1.01 ( 0.80 - 1.28 ) |  | 0.85 ( 0.66 - 1.11 ) |  | 0.88 ( 0.65 - 1.21 ) |  |  | 0.29    |
| Model 4              | 1.00   | 1.08 ( 0.85 - 1.37 ) |  | 0.95 ( 0.73 - 1.24 ) |  | 1.05 ( 0.77 - 1.43 ) |  |  | 0.97    |
| $\gamma$ -tocopherol |        |                      |  |                      |  |                      |  |  |         |
|                      | Q1     | Q2                   |  | Q3                   |  | Q4                   |  |  | Trend P |
| Person-years         | 13,984 | 14,493               |  | 14,446               |  | 14,994               |  |  |         |
| Number of cases      | 158    | 146                  |  | 141                  |  | 130                  |  |  |         |
| Model 1              | 1.00   | 0.96 ( 0.76 - 1.20 ) |  | 0.92 ( 0.73 - 1.16 ) |  | 0.89 ( 0.70 - 1.14 ) |  |  | 0.33    |
| Model 2              | 1.00   | 0.97 ( 0.77 - 1.22 ) |  | 0.93 ( 0.74 - 1.18 ) |  | 0.88 ( 0.69 - 1.13 ) |  |  | 0.29    |
| Model 3              | 1.00   | 0.87 ( 0.68 - 1.12 ) |  | 0.75 ( 0.55 - 1.02 ) |  | 0.58 ( 0.36 - 0.93 ) |  |  | 0.02    |
| Model 4              | 1.00   | 1.00 ( 0.78 - 1.29 ) |  | 0.98 ( 0.72 - 1.35 ) |  | 0.98 ( 0.62 - 1.55 ) |  |  | 0.90    |
| $\delta$ -tocopherol |        |                      |  |                      |  |                      |  |  |         |
|                      | Q1     | Q2                   |  | Q3                   |  | Q4                   |  |  | Trend P |
| Person-years         | 14,109 | 14,250               |  | 14,832               |  | 14,726               |  |  |         |
| Number of cases      | 149    | 133                  |  | 151                  |  | 142                  |  |  |         |
| Model 1              | 1.00   | 0.90 ( 0.71 - 1.14 ) |  | 0.94 ( 0.75 - 1.18 ) |  | 0.86 ( 0.68 - 1.09 ) |  |  | 0.30    |
| Model 2              | 1.00   | 0.89 ( 0.71 - 1.13 ) |  | 0.94 ( 0.75 - 1.19 ) |  | 0.84 ( 0.66 - 1.07 ) |  |  | 0.23    |
| Model 3              | 1.00   | 0.84 ( 0.66 - 1.08 ) |  | 0.86 ( 0.67 - 1.12 ) |  | 0.72 ( 0.52 - 0.99 ) |  |  | 0.07    |
| Model 4              | 1.00   | 0.91 ( 0.71 - 1.16 ) |  | 0.97 ( 0.75 - 1.25 ) |  | 0.88 ( 0.64 - 1.20 ) |  |  | 0.52    |

Model 1: Adjusted for age and sex, and stratified by area.

Model 2: Multivariable model adjusted further for energy, smoking status, and DHA+EPA.

Model 3: Multivariable model adjusted further for variables in model 2 and  $\alpha$ -linolenic acid.

Model 4: Multivariable model adjusted further for variables in model 2 and linoleic acid.
